# Supplementary material for: Surgically Treated pT2aN0M0 (Stage IB) Non-Small Cell Lung Cancer: A 20-Year Single-Center Retrospective Study
Source: MDPI journal article supplement (doi:10.3390/jcm12052081), 2023-03-06
Supplement: s1 [file s1]

**Table S1.** Patients' outcomes

| PATIENTS' OUTCOMES            |                     | N (%)     |
|-------------------------------|---------------------|-----------|
| Need for ICU                  |                     | 48 (21.9) |
| Hospital days, median [range] |                     | 6 [3-44]  |
| Post-operative complications  |                     | 67 (30.6) |
|                               | Pulmonary           | 32 (14.6) |
|                               | Cardiac             | 39 (17.8) |
|                               | Other               | 12 ( 5.5) |
|                               | Minor               | 57 (26.0) |
|                               | Major               | 10 ( 4.6) |
| Clavien-Dindo Classification  |                     |           |
|                               | 1                   | 37 (16.9) |
|                               | 2                   | 21 ( 9.6) |
|                               | 3a                  | 3 ( 1.4)  |
|                               | 3b                  | 3 ( 1.4)  |
|                               | 4a                  | 3 ( 1.4)  |
| Relapse*                      |                     | 52 (23.7) |
|                               | Local               | 12 ( 5.5) |
|                               | Regional            | 12 ( 5.5) |
|                               | Distant             | 27 (12.3) |
| Death                         |                     | 75 (34.2) |
|                               | Dead of disease     | 24 (11.0) |
|                               | Dead of other cause | 51 (23.3) |

\*Site of relapse is missing for 1 patient, 3 patients had relapse at multiple sites.

ICU: Intensive Care Unite
